# Supplementary material for: Mutations on ent-kaurene oxidase 1 encoding gene attenuate its enzyme activity of catalyzing the reaction from ent-kaurene to ent-kaurenoic acid and lead to delayed germination in rice
Source: PubMed Central journal article supplement (PMC6977763; doi:10.1371/journal.pgen.1008562), 2020-01-10
Supplement: pgen.1008562.s003.pdf [file pgen.1008562.s003.pdf]

**Table S3.** Significantly differentially expressed genes.

| Gene ID      |                     |                   |                        |                   | description               |
|--------------|---------------------|-------------------|------------------------|-------------------|---------------------------|
| <b>a</b>     | FPKM <sub>mGA</sub> | FPKM <sub>m</sub> | FPKM <sub>wt</sub>     | FPKM <sub>m</sub> |                           |
| OS01G0256500 | 111601.50           | 291251.10         | 207709.36              | 294198.           | LEA-5                     |
| OS03G0159600 | 1819.93             | 8177.40           | 10056.83               | 8247.76           | Seed maturation protein   |
| OS03G0168100 | 2564.30             | 7673.76           | 9692.15                | 7749.36           | LEA-3                     |
| OS03G0197300 | 14451.37            | 52231.60          | 50474.80               | 52702.8           | Cupin 1                   |
| OS03G0663800 | 187.39              | 1862.15           | 747.42                 | 1879.23           | Cupin 1                   |
| OS03G0747400 | 308.49              | 2190.61           | 1208.32                | 2209.72           | Seed maturation protein   |
| OS03G0747500 | 307.35              | 1510.17           | 809.24                 | 1523.56           | Seed maturation protein   |
| OS03G0793700 | 3811.01             | 38233.88          | 15852.14               | 38559.8           | Cupin 1                   |
| OS04G0589800 | 5021.79             | 18148.51          | 15282.35               | 18317.9           | LEA-25                    |
| OS08G0127900 | 3626.92             | 16969.55          | 7848.61                | 17121.9           | 11-S seed storage protein |
| OS12G0626500 | 103.30              | 1166.20           | 736.95                 | 1175.43           | Seed maturation protein   |
| OS03G0342900 | 770.47              | 2671.60           | 1902.64                | 2697.52           | Dormancy associated       |
| OS03G0607200 | 480.89              | 2027.50           | 1041.83                | 2048.19           | GA regulated protein      |
| OS11G0671000 | 485.25              | 2198.98           | 995.56                 | 2221.54           | Dormancy associated       |
| OS02G0186200 | 15.84               | 56.75             | 16.80                  | 57.26             | Cytochrome P450           |
| OS03G0856700 | 1121.73             | 5239.61           | 2617.93                | 5298.03           | GA20ox                    |
| OS06G0562200 | 72.99               | 347.76            | 153.49                 | 350.82            | PYR/PYL                   |
| OS10G0564500 | 179.77              | 740.14            | 455.90                 | 746.66            | SnRK2                     |
| OS06G0612800 | 8783.12             | 28685.08          | 17515.81               | 28950.2           | Zinc finger               |
| OS01G0702500 | 181.92              | 2957.40           | 2253.26                | 2980.62           | Dehydrin                  |
| OS01G0762500 | 1391.53             | 2157.24           | 756.29                 | 2182.47           | 11-S seed storage protein |
| OS02G0242600 | 31.30               | 91.69             | 6.86                   | 92.48             | 11-S seed storage protein |
| OS02G0249000 | 141.35              | 192.49            | 62.89                  | 194.64            | 11-S seed storage protein |
| OS02G0249600 | 1000.83             | 1676.17           | 347.41                 | 1693.82           | 11-S seed storage protein |
| OS03G0427300 | 290.45              | 779.86            | 187.30                 | 787.33            | 11-S seed storage protein |
| OS10G0400200 | 937.97              | 1408.66           | 548.97                 | 1424.94           | 11-S seed storage protein |
| OS02G0453600 | 331.55              | 437.83            | 79.18                  | 443.20            | Cupin 1                   |
| <b>b</b>     | FPKM <sub>wt</sub>  | FPKM <sub>m</sub> | log <sub>2</sub> Ratio | pval              |                           |
| OS01G0762500 | 756.29              | 2182.47           | -1.52                  | 5.67E-05          | 11-S seed storage protein |
| OS02G0242600 | 6.86                | 92.48             | -3.75                  | 1.54E-05          | 11-S seed storage protein |
| OS02G0249000 | 62.89               | 194.64            | -1.62                  | 7.82E-05          | 11-S seed storage protein |
| OS02G0249600 | 347.41              | 1693.82           | -2.28                  | 2.14E-09          | 11-S seed storage protein |
| OS03G0427300 | 187.30              | 787.33            | -2.07                  | 2.88E-07          | 11-S seed storage protein |
| OS10G0400200 | 548.97              | 1424.94           | -1.37                  | 2.69E-04          | 11-S seed storage protein |
| OS02G0453600 | 79.18               | 443.20            | -2.48                  | 1.30E-08          | Cupin 1                   |
| OS05G0328800 | 12.69               | 53.75             | -2.08                  | 1.36E-04          | alpha-amylase inhibitor   |
| OS05G0331532 | 6.38                | 31.65             | -2.30                  | 1.38E-04          | alpha-amylase inhibitor   |
| OS07G0219400 | 80.96               | 237.74            | -1.55                  | 1.58E-04          | Bifunctional inhibitor    |
| OS06G0569900 | 0                   | 12.16             | Infinite               | 1.61E-05          | Cytochrome P450           |
| <b>c</b>     | FPKM <sub>wt</sub>  | FPKM <sub>m</sub> | log <sub>2</sub> Ratio | pval              |                           |

|              |                     |                   |                        |          |                           |
|--------------|---------------------|-------------------|------------------------|----------|---------------------------|
| OS08G0338000 | 491.89              | 136.87            | 1.84                   | 4.20E-06 | Myb/SANT-like domain      |
| OS11G0492800 | 9.28                | 0                 | Infinite               | 2.79E-04 | Alpha/Beta hydrolase fold |
| OS11G0620300 | 314.16              | 23.71             | 3.72                   | 2.34E-16 | Bifunctional inhibitor    |
| OS06G0204100 | 164.95              | 4.76              | 5.11                   | 4.38E-20 | Cytochrome P450           |
| OS07G0217600 | 13.53               | 0.43              | 4.96                   | 5.30E-05 | Cytochrome P450           |
| OS09G0325700 | 953.36              | 302.30            | 1.65                   | 1.87E-05 | PP2C                      |
| d            | FPKM <sub>mGA</sub> | FPKM <sub>m</sub> | log <sub>2</sub> Ratio | pval     |                           |
| OS01G0256500 | 111601.50           | 291251.10         | -1.38                  | 4.03E-04 | LEA-5                     |
| OS03G0159600 | 1819.93             | 8177.40           | -2.16                  | 6.31E-04 | Seed maturation protein   |
| OS03G0168100 | 2564.30             | 7673.76           | -1.58                  | 1.90E-04 | LEA-3                     |
| OS03G0197300 | 14451.37            | 52231.60          | -1.85                  | 4.15E-04 | Cupin 1                   |
| OS03G0663800 | 187.39              | 1862.15           | -3.31                  | 1.78E-08 | Cupin 1                   |
| OS03G0747400 | 308.49              | 2190.61           | -2.82                  | 3.31E-05 | Seed maturation protein   |
| OS03G0747500 | 307.35              | 1510.17           | -2.29                  | 4.85E-04 | Seed maturation protein   |
| OS03G0793700 | 3811.01             | 38233.88          | -3.32                  | 1.13E-05 | Cupin 1                   |
| OS04G0589800 | 5021.79             | 18148.51          | -1.85                  | 1.44E-04 | LEA-25                    |
| OS08G0127900 | 3626.92             | 16969.55          | -2.22                  | 4.29E-05 | 11-S seed storage protein |
| OS12G0626500 | 103.30              | 1166.20           | -3.49                  | 2.38E-04 | Seed maturation protein   |
| OS03G0342900 | 770.47              | 2671.60           | -1.79                  | 1.28E-05 | Dormancy associated       |
| OS03G0607200 | 480.89              | 2027.50           | -2.07                  | 7.32E-07 | GA regulated protein      |
| OS11G0671000 | 485.25              | 2198.98           | -2.18                  | 8.20E-08 | Dormancy associated       |
| OS02G0186200 | 15.84               | 56.75             | -1.84                  | 3.62E-04 | Cytochrome P450           |
| OS03G0856700 | 1121.73             | 5239.61           | -2.22                  | 3.26E-07 | GA20ox                    |
| OS06G0562200 | 72.99               | 347.76            | -2.25                  | 2.39E-04 | PYR/PYL                   |
| OS10G0564500 | 179.77              | 740.14            | -2.04                  | 3.05E-04 | SnRK2                     |
| OS01G0702500 | 181.92              | 2957.40           | -4.02                  | 1.20E-04 | Dehydrin                  |
| OS06G0612800 | 8783.12             | 28685.08          | -1.70                  | 1.59E-04 | Zinc finger               |
| e            | FPKM <sub>mGA</sub> | FPKM <sub>m</sub> | log <sub>2</sub> Ratio | pval     |                           |
| OS01G0285300 | 63.76               | 18.57             | 1.77                   | 4.69E-04 | SANT/Myb domain           |
| OS12G0564100 | 97.47               | 25.19             | 1.95                   | 2.67E-05 | SANT/Myb domain           |
| OS11G0128500 | 24.32               | 2.12              | 3.51                   | 3.24E-06 | SANT/Myb domain           |
| OS03G0103100 | 383.49              | 79.17             | 2.27                   | 9.22E-05 | lipid transfer protein    |
| OS10G0191100 | 41.79               | 7.73              | 2.43                   | 1.27E-05 | lipid transfer protein    |
| OS10G0349300 | 1005.69             | 258.07            | 1.96                   | 1.43E-06 | lipid transfer protein    |
| OS10G0349400 | 465.67              | 87.29             | 2.41                   | 2.90E-05 | lipid transfer protein    |
| OS10G0552200 | 682.63              | 243.06            | 1.48                   | 1.55E-04 | lipid transfer protein    |
| OS07G0106200 | 961.10              | 330.04            | 1.54                   | 8.10E-05 | Sugar transporter         |
| OS11G0643800 | 345.80              | 99.82             | 1.79                   | 1.95E-05 | Sugar transporter         |
| OS08G0475400 | 650.73              | 216.41            | 1.58                   | 1.22E-04 | Alpha hydrolase fold-3    |
| OS11G0138900 | 23.04               | 4.23              | 2.44                   | 3.58E-04 | Alpha hydrolase fold      |
| OS02G0596300 | 150.68              | 43.77             | 1.78                   | 5.50E-04 | Cytochrome P450           |
| OS03G0225900 | 90.74               | 19.69             | 2.20                   | 4.66E-04 | Cytochrome P450           |
| OS03G0367101 | 57.28               | 7.48              | 2.93                   | 2.42E-07 | Cytochrome P450           |
| OS03G0760500 | 45.27               | 9.85              | 2.19                   | 4.82E-05 | Cytochrome P450           |

|              |         |        |      |          |                 |
|--------------|---------|--------|------|----------|-----------------|
| OS06G0110000 | 271.82  | 84.89  | 1.67 | 1.28E-04 | Cytochrome P450 |
| OS07G0603700 | 77.32   | 23.54  | 1.71 | 2.58E-04 | Cytochrome P450 |
| OS11G0289700 | 1334.61 | 295.90 | 2.17 | 3.74E-07 | Cytochrome P450 |
| OS12G0582700 | 67.86   | 19.84  | 1.77 | 4.91E-04 | Cytochrome P450 |
| OS01G0209700 | 32.74   | 7.49   | 2.12 | 5.58E-04 | GA2ox           |

a: Genes have higher expression in mutant compared with both wild-type and mutant treated with GA treatment. b: Genes have higher expression in mutant only than wild-type. c: Genes have higher expression in wild-type compared to mutant. d: Genes have higher expression in mutant only than mutant with GA treatment. e: Genes have higher expression in mutant with GA compared to mutant. Gene IDs with red font were those also detected in proteomic study.
