# Supplementary material for: Mutations on ent-kaurene oxidase 1 encoding gene attenuate its enzyme activity of catalyzing the reaction from ent-kaurene to ent-kaurenoic acid and lead to delayed germination in rice
Source: PubMed Central journal article supplement (PMC6977763; doi:10.1371/journal.pgen.1008562), 2020-01-10
Supplement: pgen.1008562.s005.pdf [file pgen.1008562.s005.pdf]

**Table S5.** Primers used in this study.

| Primer name | Primer sequence                    | Purpose       |
|-------------|------------------------------------|---------------|
| CPS-F       | 5' GCGTGCATTTTCGAACCAA 3'          | Real-time PCR |
| CPS-R       | 5' TTGGCCAGCACTGACACTCT 3'         | Real-time PCR |
| KS-F        | 5' GTTCCCGTCAGCATCCGTG 3'          | Real-time PCR |
| KS-R        | 5' GCTCCTGCCAACATTCCA 3'           | Real-time PCR |
| OsKO1-F     | 5' CCCGCCTCCAGCTGTTC 3'            | Real-time PCR |
| OsKO1-R     | 5' AGCCCCGGTCCTTATAGTGT 3'         | Real-time PCR |
| OsKO2-F     | 5' CTACAATGCTACTGTGACCGAC 3'       | Real-time PCR |
| OsKO2-R     | 5' ATCCTTTCTTCTGCTGCTT 3'          | Real-time PCR |
| OsKO4-F     | 5' CATCCTGGCTGCAGCTGATA 3'         | Real-time PCR |
| OsKO4-R     | 5' GGAACACGGCGTTGAGGTA 3'          | Real-time PCR |
| KAO-F       | 5' CAGCAACGCAGAACGGATTA 3'         | Real-time PCR |
| KAO-R       | 5' ACGGAAGGACACGAAGGAGA 3'         | Real-time PCR |
| GA20ox1-F   | 5' TACTGCCACGAGATGAGCC 3'          | Real-time PCR |
| GA20ox1-R   | 5' ACGCCGGGTAGTAGTTGAG 3'          | Real-time PCR |
| GA20ox2-F   | 5' GACCGCTTCGCCTCCAA 3'            | Real-time PCR |
| GA20ox2-R   | 5' GCGACAGCTCCTTCATCTCC 3'         | Real-time PCR |
| GA3ox2-F    | 5' TCTTCTCCAAGCTCATGTGGT 3'        | Real-time PCR |
| GA3ox2-R    | 5' AACTCCTCCATCACGTCACAG 3'        | Real-time PCR |
| GA2ox1-F    | 5' CGAGCAAACGATGTGGAAGGGCTACAGG 3' | Real-time PCR |
| GA2ox1-R    | 5' TGGCTCAGGCGGAGTGAGTACATTGTCG 3' | Real-time PCR |
| OsNCED2-F   | 5' AGCCGACGATGATCCACGACTT 3'       | Real-time PCR |
| OsNCED2-R   | 5' GCCTCCTCCCACGCATTCCACA 3'       | Real-time PCR |
| OsNCED3-F   | 5' TCTTCGCGCTCAGCTACAATGT 3'       | Real-time PCR |
| OsNCED3-R   | 5' GCCTTCTCCCTGTCGTATACCA 3'       | Real-time PCR |
| OsABA8ox2-F | 5' CGTCTTCTTCGCCTCCAA 3'           | Real-time PCR |
| OsABA8ox2-R | 5' ATCATCCGCTCCTTGCTC 3'           | Real-time PCR |
| Amylase-2-F | 5' ACTTCTTGTCCTTTCCG 3'            | Real-time PCR |
| Amylase-2-R | 5' GCCCATAAGCAGGTTGTA 3'           | Real-time PCR |
| GAMYB-F     | 5' GAATCCACCCCTCCTGTT 3'           | Real-time PCR |
| GAMYB-R     | 5' GCCCCATTACTTGCTCTC 3'           | Real-time PCR |
| GID2-F      | 5' TCGGTGTTTTATTACGAGATCC 3'       | Real-time PCR |
| GID2-R      | 5' GAAGTCCACAGCGTCAGGTT 3'         | Real-time PCR |
| ARAG1-F     | 5' CAACGACGGTGAGGGAGGAG 3'         | Real-time PCR |
| ARAG1-R     | 5' CGGGGAACAGTAGCGAGCAG 3'         | Real-time PCR |
| PYR/PYL-F   | 5' GCGGGTGTCGTGTTATTTGT 3'         | Real-time PCR |
| PYR/PYL-R   | 5' CCGTACAAACCAAACAGGCT 3'         | Real-time PCR |
| PP2C-F      | 5' GTCACCCAGCTGATGCTGTA 3'         | Real-time PCR |
| PP2C-R      | 5' TAGCAGTTGCACAACCCCAT 3'         | Real-time PCR |
| SnRK2-F     | 5' GAGGGAGAAGGCCGACTACA 3'         | Real-time PCR |

|                             |                                  |                |
|-----------------------------|----------------------------------|----------------|
| SnRK2-R                     | 5' TAGGTGTCATACTCATCGGCG 3'      | Real-time PCR  |
| U50-F                       | 5' CGAGAACGGCGAGAAGTGGT 3'       | Real-time PCR  |
| U50-R                       | 5' GGACGGAGATGGTATGGAGA 3'       | Real-time PCR  |
| U53-F                       | 5' TGCTCAACCCCGTCTCCACT 3'       | Real-time PCR  |
| U53-R                       | 5' TTGCTCAGCTCCCGTATCTG 3'       | Real-time PCR  |
| T46-F                       | 5' CGAGAACTGCTACGGATGGA 3'       | Real-time PCR  |
| T46-R                       | 5' CGGGATGCTGGGACAGACTA 3'       | Real-time PCR  |
| U49-F                       | 5' AGATGGGGGAGGAAGGGT 3'         | Real-time PCR  |
| U49-R                       | 5' CTCGTCGATGTCGATGCC 3'         | Real-time PCR  |
| U32-F                       | 5' GCGACCAAGAACAAGCTGG 3'        | Real-time PCR  |
| U32-R                       | 5' TCACGCCGTCTTGA ACTC 3'        | Real-time PCR  |
| U47-F                       | 5' ATGAGCCAGGAGCAGCCGA 3'        | Real-time PCR  |
| U47-R                       | 5' GTCTTCCCCAGCACGAGGT 3'        | Real-time PCR  |
| U51-F                       | 5' GCGACGGAGAACATCTACG 3'        | Real-time PCR  |
| U51-R                       | 5' GCCTTCACCCGCATCATCA 3'        | Real-time PCR  |
| U2-F                        | 5' GGGCAGGTGATGGCGCAGTT 3'       | Real-time PCR  |
| U2-R                        | 5' ACGGGCTCGTTGTCGTCGGA 3'       | Real-time PCR  |
| D30-F                       | 5' AACGATCGGGAGACGGGGAG 3'       | Real-time PCR  |
| D30-R                       | 5' GTTGACGGTGATGTTGCGGC 3'       | Real-time PCR  |
| R21-F                       | 5' GCGTTCGTGACCTTGAAAAGCA 3'     | Real-time PCR  |
| R21-R                       | 5' CGTTGGGGTCGTAGGAGCAGAG 3'     | Real-time PCR  |
| U15-F                       | 5' CGGGTTAAGGCAATGGAGGT 3'       | Real-time PCR  |
| U15-R                       | 5' TGTGGCGTTAGTTTGGGCAG 3'       | Real-time PCR  |
| T45-F                       | 5' TCAACGACCCCTTCATCACC 3'       | Real-time PCR  |
| T45-R                       | 5' AACCTTCTTGGCACCACCCT 3'       | Real-time PCR  |
| Osactin1-F                  | 5' GGAAGTACAGTGTCTGGATTGGAG 3'   | Real-time PCR  |
| Osactin1-R                  | 5' TCTTGGCTTAGCATTCTTGGGT 3'     | Real-time PCR  |
| Os06g0570100-F              | 5' ATGGAGGCGTTCGTGCCG 3'         | CDS clone      |
| Os06g0570100-R              | 5' TCACATCCTTCCTCTGCGCG 3'       | CDS clone      |
| Os06g0569900-F              | 5' ATGGAGTCGCTGCTCGCA 3'         | CDS clone      |
| Os06g0569900-R              | 5' TCACATCCTTCCTCTGGGC 3'        | CDS clone      |
| Os06g0569500-F              | 5' ATGGAGTCGATGCTCGTAGC 3'       | CDS clone      |
| Os06g0569500-R              | 5' TCACATCCTTCCTCTGGGCT 3'       | CDS clone      |
| Os06g0570100-pro<br>moter-F | 5' ATCAATGCTCCTGGTTCTTTTG 3'     | Promoter clone |
| Os06g0570100-pro<br>moter-R | 5' GGATCACACGCTGTGCGC 3'         | Promoter clone |
| Os06g0569900-pro<br>moter-F | 5' GAAAATGTTTCACTCATTTAAATCA 3'  | Promoter clone |
| Os06g0569900-pro<br>moter-R | 5' GGCCGACCCCTACTCAGA 3'         | Promoter clone |
| Os06g0569900RNA             | 5'GGGGACAAGTTTGTACAAAAAAGCAGGCTT | OsKO1 RNAi     |

---

|                 |                                   |                  |
|-----------------|-----------------------------------|------------------|
| i-F             | CCCTCAATGCCGTCTTCCAG 3'           |                  |
| Os06g569900RNAi | 5'GGGGACCACTTTGTACAAGAAAGCTGGGTCT | OsKO1 RNAi       |
| -R              | TCTCCTCGTCACCCTCCCTCA 3'          |                  |
| Os06g0570100RNA | 5' GGGGACAAGTTTGTACAAAAAAGCAGG    | OsKO2 RNAi       |
| i-F             | CTTACCTCAACGCCGTCTTCCA 3'         |                  |
| Os06g0570100RNA | 5' GGGGACCACTTTGTACAAGAAAGCTGG    | OsKO2 RNAi       |
| i-R             | GTCTTCTCCTCGTCACCCTCCCT 3'        |                  |
| KO2-taqman-F    | 5' ATGAACAGGAAGGAGTGGGAGT 3'      | Linkage analysis |
| KO2-taqman-R    | 5' TGGAGCTTGTAGGCGGTGAG 3'        | Linkage analysis |

---
