# Supplementary material for: Mutations on ent-kaurene oxidase 1 encoding gene attenuate its enzyme activity of catalyzing the reaction from ent-kaurene to ent-kaurenoic acid and lead to delayed germination in rice
Source: PubMed Central journal article supplement (PMC6977763; doi:10.1371/journal.pgen.1008562), 2020-01-10

**Fig. S1.** Distribution and sequence alignment analyses of *OsKO* genes. (A) Contiguously arranged five *OsKO* genes in a 120 kb highly linked region on the sixth chromosome of rice genome. The row marked by red filled circle shows the old nomenclature of *OsKO* genes, and that marked by green filled circle shows the updated name of each *OsKO* gene. (B) Three-dimensional structures of the wild type (left panel) and mutated (right panel) *OsKO1* proteins. The green arrow indicates the mutated site.

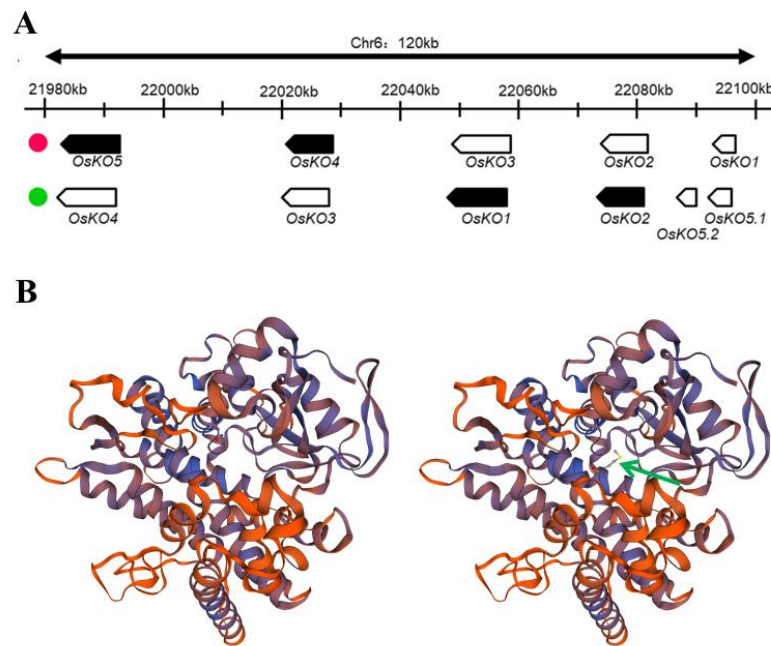

Supplement: pgen.1008562.s006.pdf [file pgen.1008562.s006.pdf]
