# Supplementary material for: Mutations on ent-kaurene oxidase 1 encoding gene attenuate its enzyme activity of catalyzing the reaction from ent-kaurene to ent-kaurenoic acid and lead to delayed germination in rice
Source: PubMed Central journal article supplement (PMC6977763; doi:10.1371/journal.pgen.1008562), 2020-01-10

**Fig. S4.** Subcellular localization analysis of OsKO1 and OsKO2 with their full length CDS fused with GFP protein. The GFP containing vector was used as control. Scale bars = 2.5  $\mu$ m.

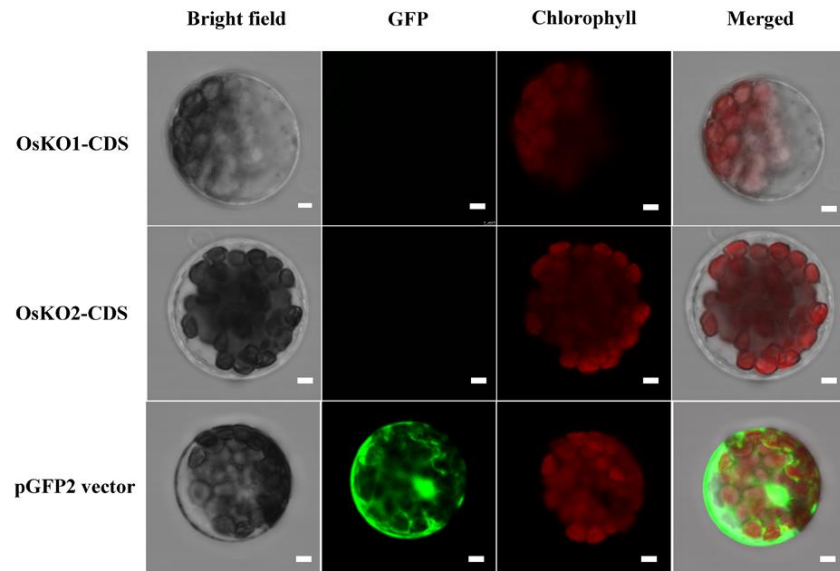

Supplement: pgen.1008562.s009.pdf [file pgen.1008562.s009.pdf]
