# Supplementary material for: Mutations on ent-kaurene oxidase 1 encoding gene attenuate its enzyme activity of catalyzing the reaction from ent-kaurene to ent-kaurenoic acid and lead to delayed germination in rice
Source: PLOS journal article supplement (doi:10.1371/journal.pgen.1008562), 2020-01-10
Supplement: S1 (10.1371/journal.pgen.1008562.s001) [file journal.pgen.1008562.s001]

**Table S1. Genes that exist in the region associated with mutant phenotype.**

| <b>Gene ID</b>  | <b>Annotation</b>                                       |
|-----------------|---------------------------------------------------------|
| Os06t0569601-01 | Hypothetical gene.                                      |
| Os06t0569900-01 | Similar to Ent-kaurene oxidase 1                        |
| Os06t0570100-01 | Ent-kaurene oxidase 2.                                  |
| Os06t0570600-00 | Similar to Ent-kaurene oxidase 5.                       |
| Os06t0570900-00 | Helix-loop-helix DNA-binding domain containing protein  |
| Os06t0571300-01 | Similar to predicted protein.                           |
| Os06t0582600-01 | Similar to Cysteine proteinase.                         |
| Os06t0595900-01 | Conserved hypothetical protein.                         |
| Os06t0595900-02 | Hypothetical conserved gene.                            |
| Os06t0596300-01 | Similar to Acyl-ACP thioesterase                        |
| Os06t0597000-01 | Similar to Auxin responsive protein IAA-Re.             |
| Os06t0599700-00 | Conserved hypothetical protein.                         |
| Os06t0612001-00 | Conserved hypothetical protein.                         |
| Os06t0612900-00 | Similar to predicted protein.                           |
| Os06t0613000-01 | Hypothetical conserved gene.                            |
| Os06t0614300-01 | C-CAP/cofactor C-like domain domain containing protein. |
| Os06t0619066-00 | Hypothetical protein.                                   |
| Os06t0619600-00 | Hypothetical conserved gene.                            |
| Os06t0621500-01 | Conserved hypothetical protein.                         |
| Os06t0623700-00 | Similar to strictosidine synthase 1.                    |
